# Supplementary material for: Macaque antibodies targeting Marburg virus glycoprotein induced by multivalent immunization
Source: PubMed Central journal article supplement (PMC11329191; doi:10.1128/jvi.00155-24), 2024-06-04
Supplement: jvi.00155-24-s0001.pdf [file jvi.00155-24-s0001.pdf]

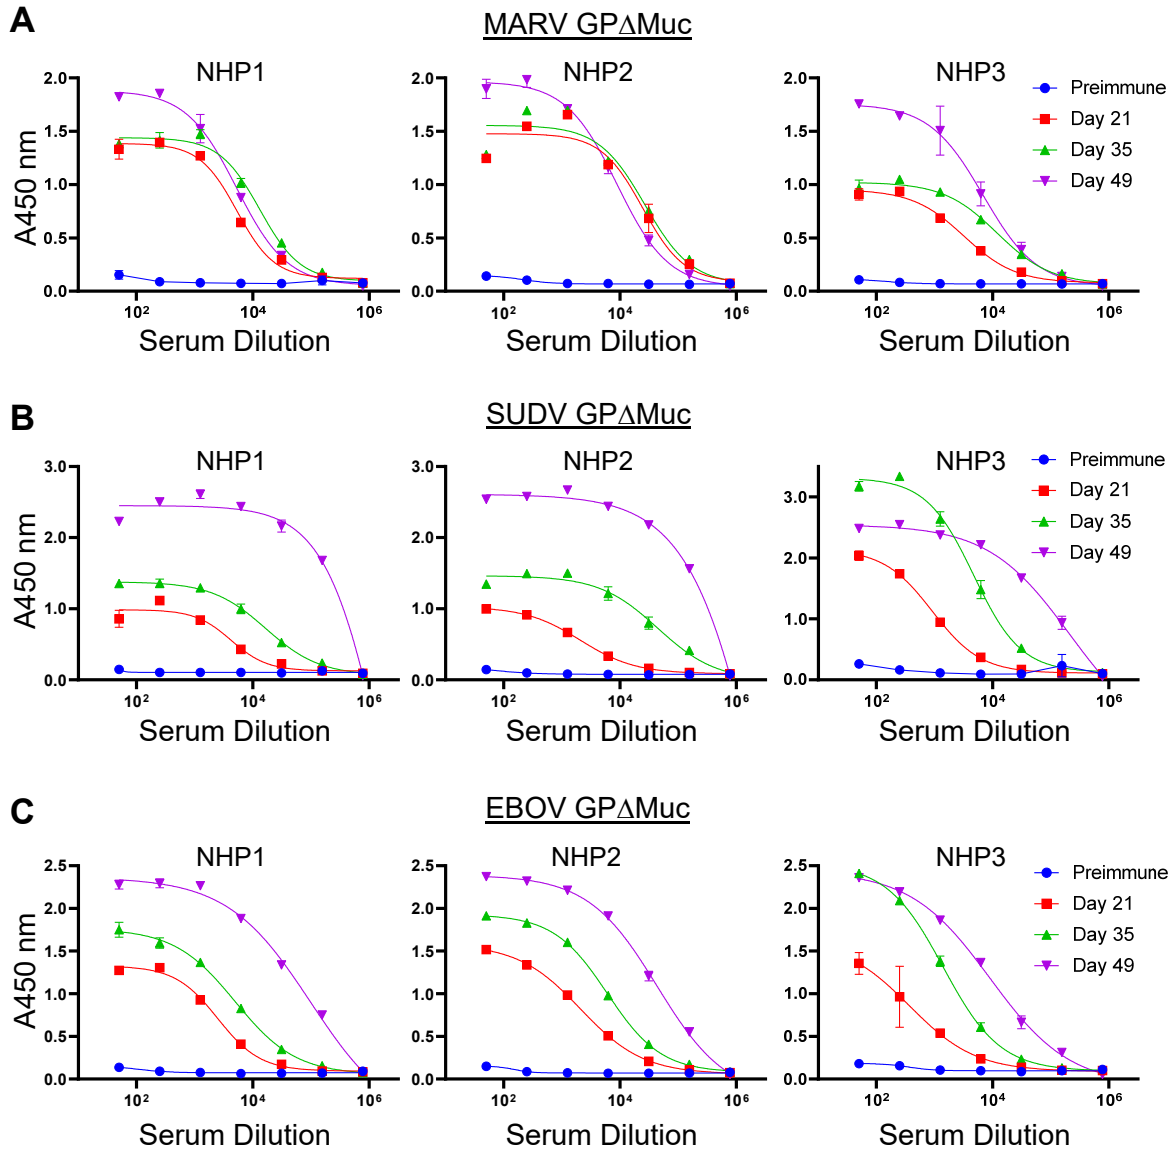

**Figure S1. Serum antibody recognition of autologous GPs.** ELISA binding profiles of serum bleeds from each animal taken on study days 0 (preimmune), 21, 35, and 49 to recombinant MARV GP $\Delta$ Muc (A), SUDV GP $\Delta$ Muc (B), and EBOV GP $\Delta$ Muc (C). Shown are means of technical duplicates with error bars indicating standard deviation. Results are of representative experiments repeated two or more times.

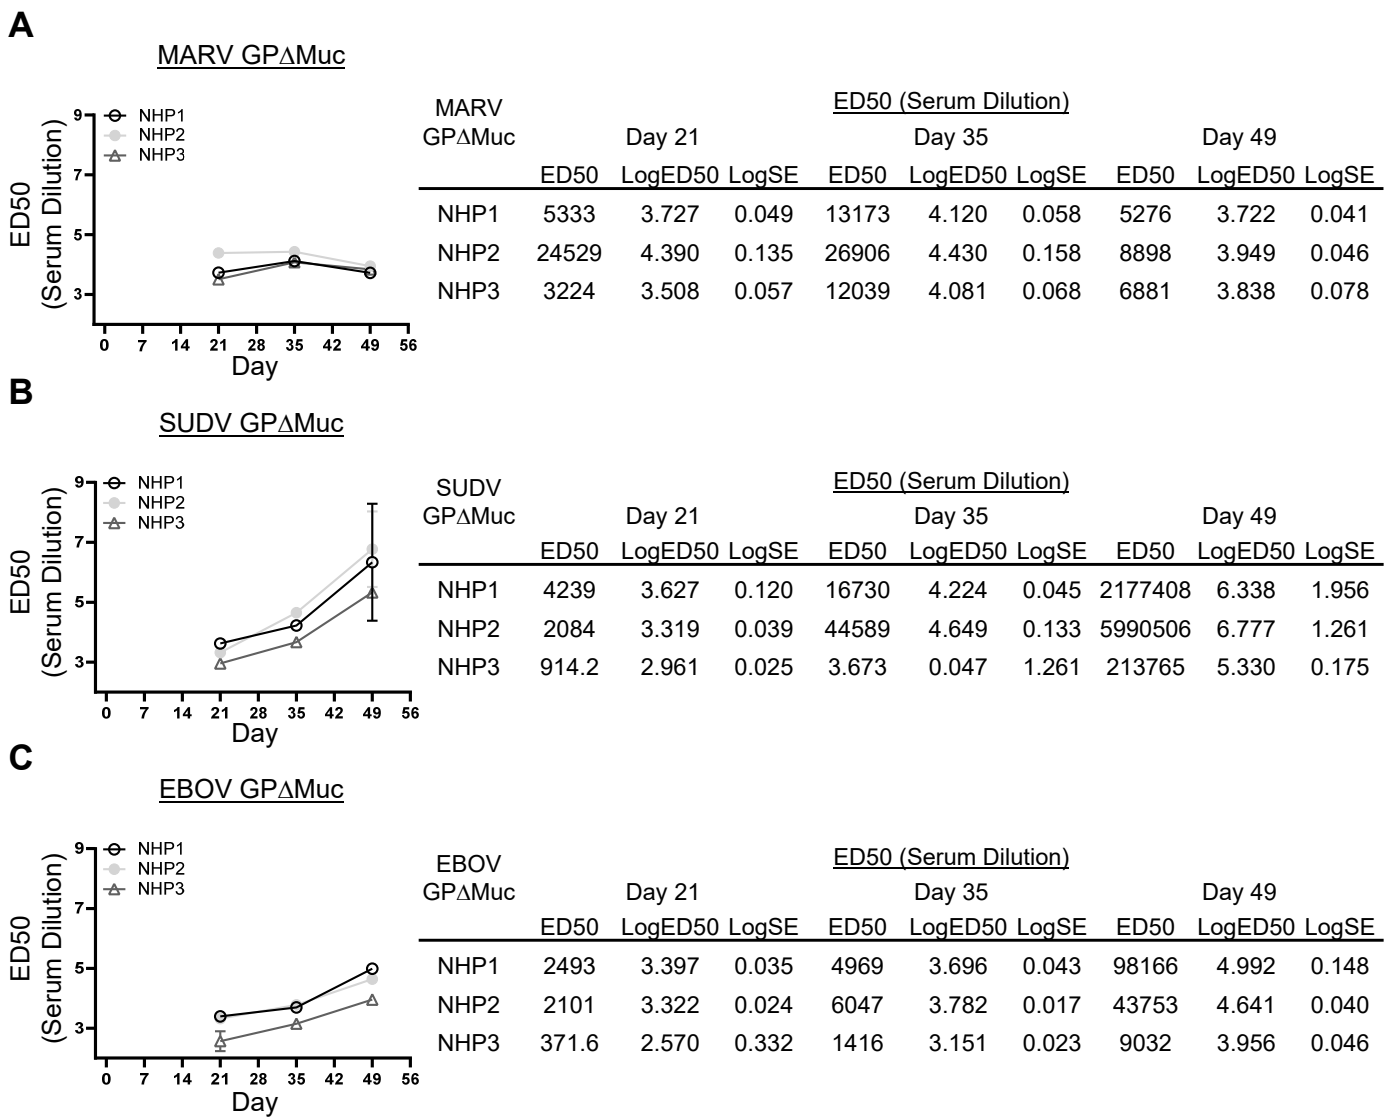

**Figure S2. Serum antibody binding ED50s to autologous GPs across study days 21, 35, and 49.** Progression of serum ELISA 50% binding effective dilutions (ED50s) across study days 21, 35, and 49 to recombinant MARV GP $\Delta$ Muc (A), SUDV GP $\Delta$ Muc (B), and EBOV GP $\Delta$ Muc (C). Binding ED50, logED50, and logSE were calculated in Graphpad Prism using the plots shown in Fig. S1. Error bars represent logSE (log Standard Error).

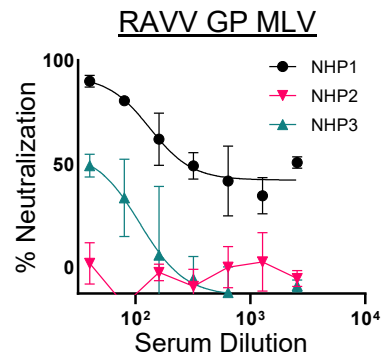

**Figure S3. NHP1, NHP2, and NHP3 day 49 serum neutralization of heterologous marburgvirus RAVV GP MLV pseudoviruses.** Shown are means of technical duplicates with error bars indicating standard deviation. Results are of a representative experiment repeated three times.

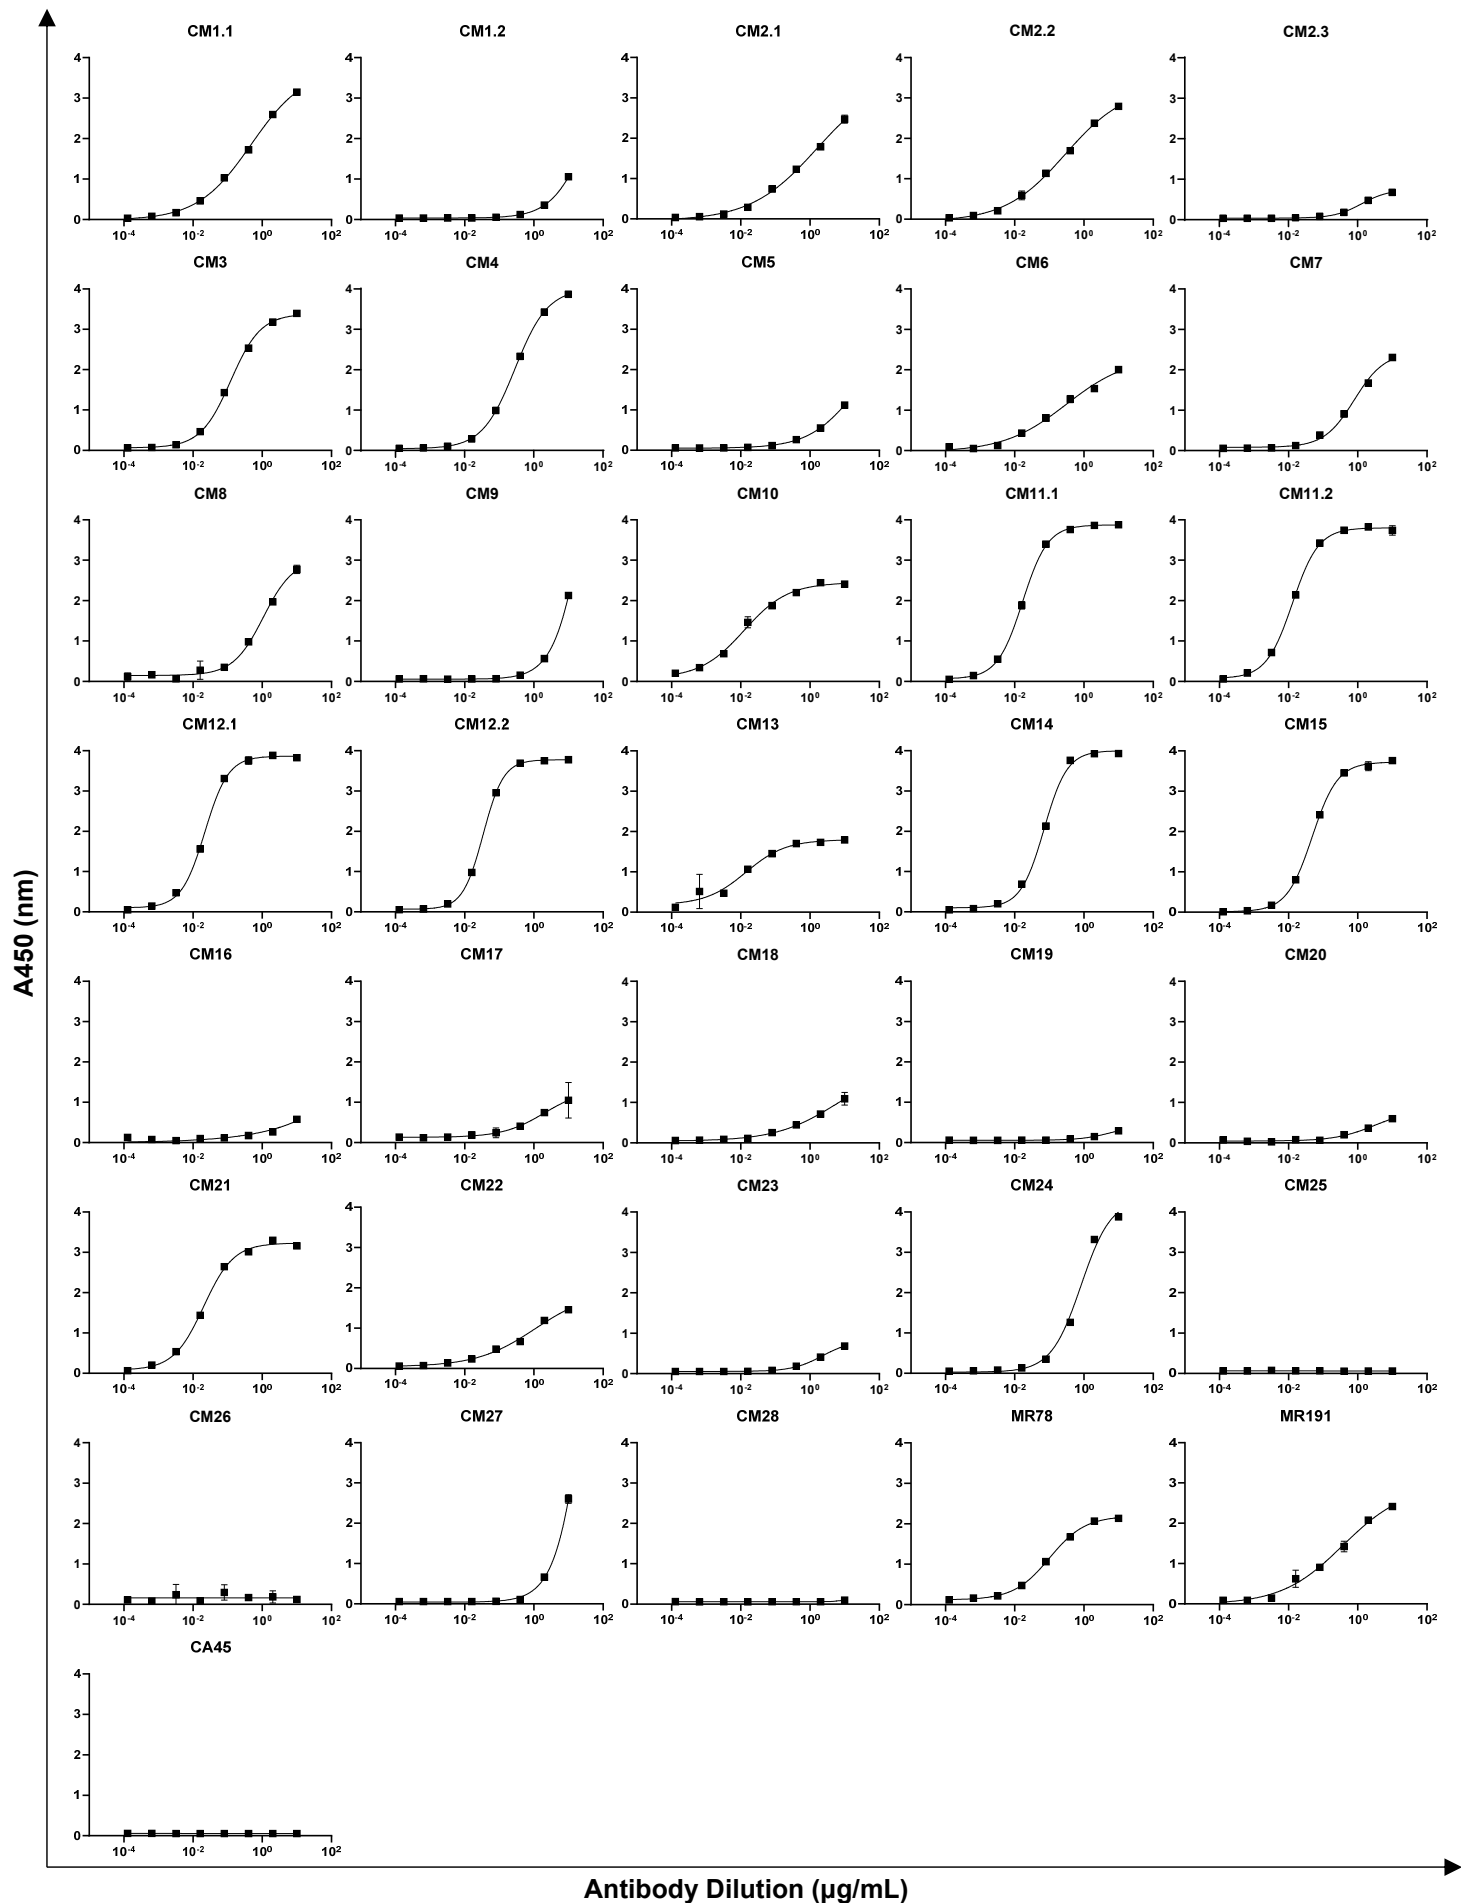

**Figure S4. Antibody ELISA binding profiles to RAVV GPΔMuc.** ELISA binding profiles of each individual antibody to RAVV GPΔMuc. Shown are means of technical duplicates with error bars indicating standard deviation. Results are of representative experiments performed at least two times for antibodies that exhibited detectable binding.

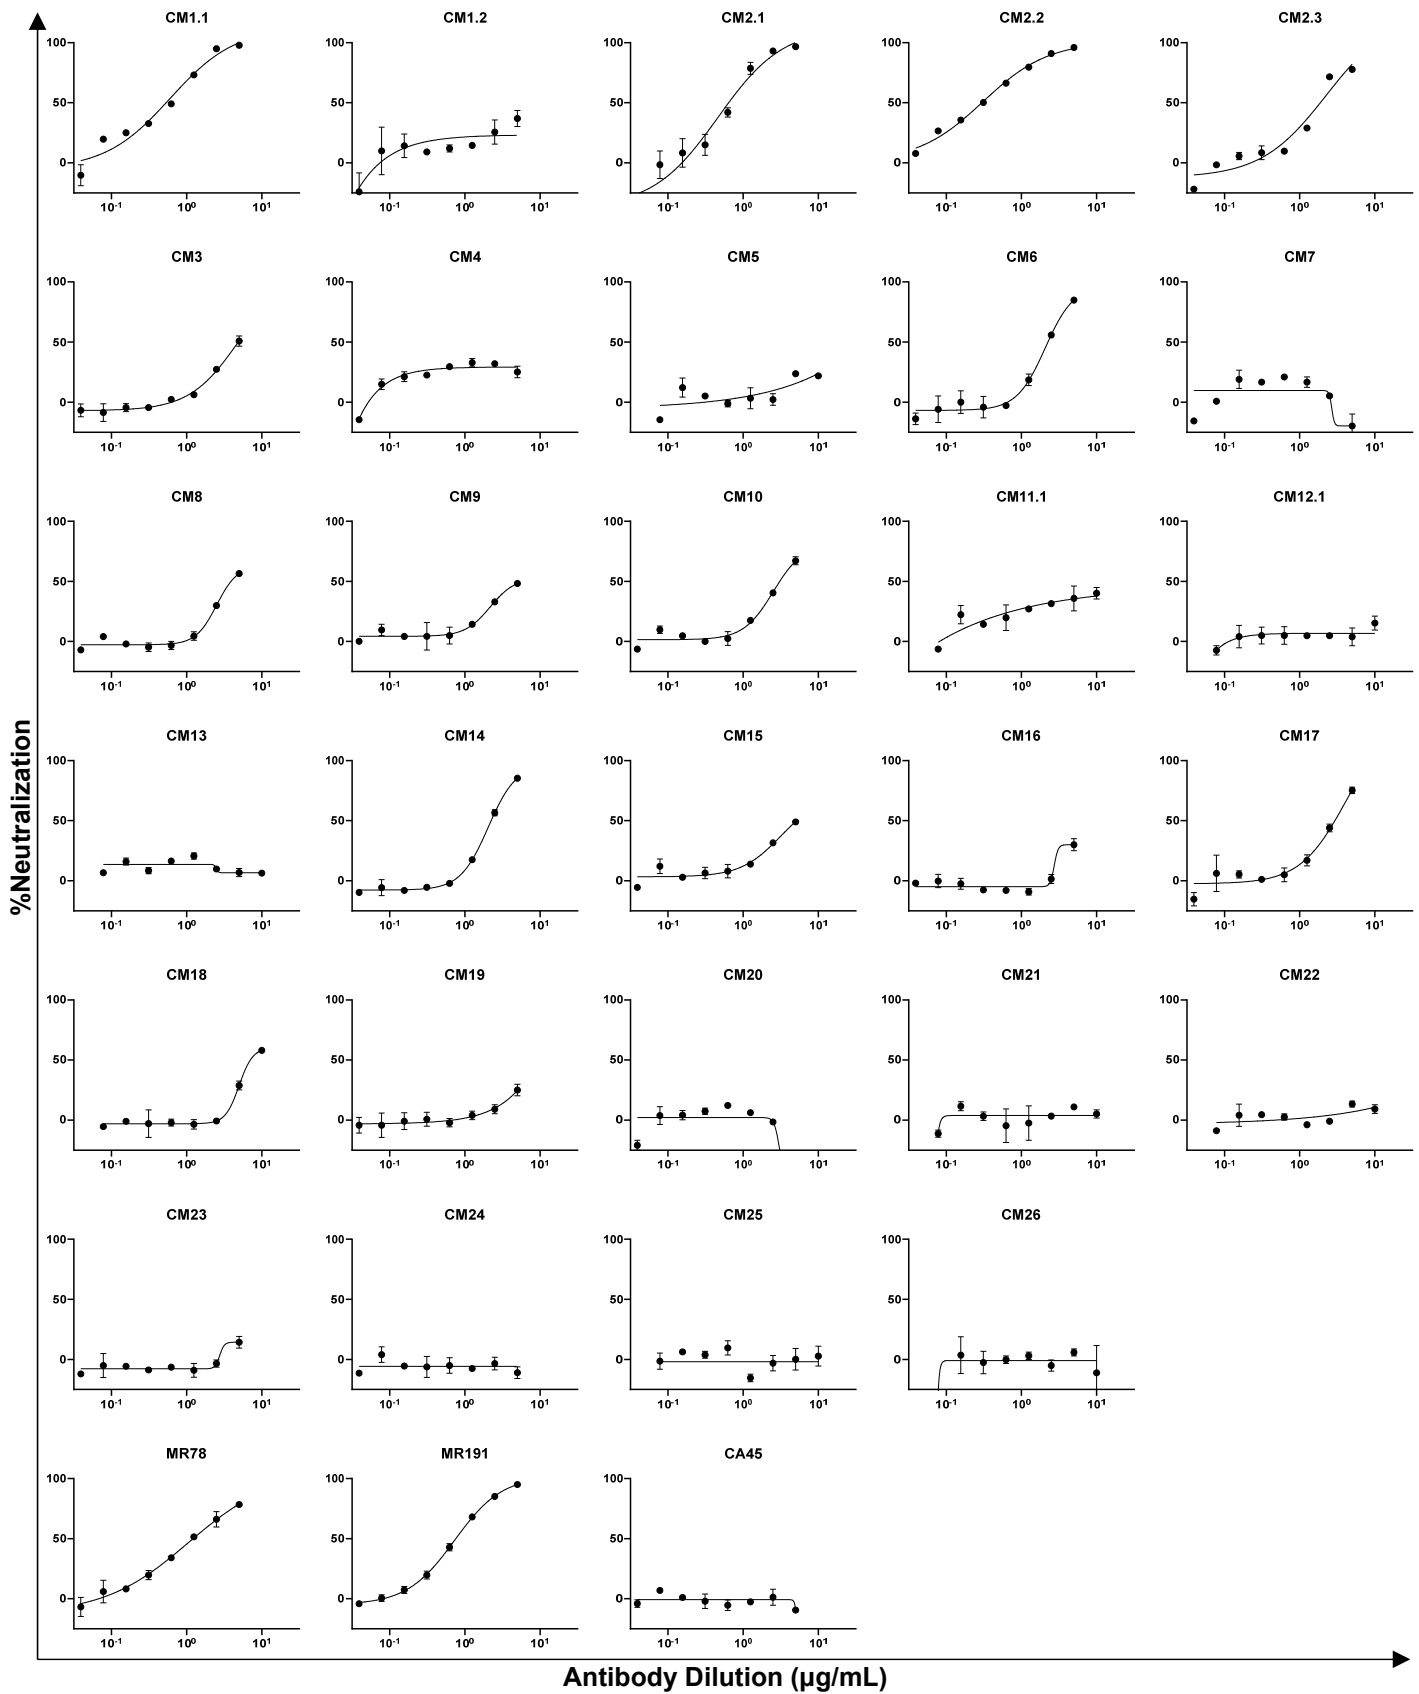

**Figure S5. Antibody neutralization of Musoke MARV-MLV pseudoviruses.** Neutralization profiles of each individual antibody against MARV-GP MLV pseudoviruses. Shown are means of technical duplicates with error bars indicating standard deviation. Results are of representative experiments performed at least two times for antibodies that exhibited detectable neutralization.

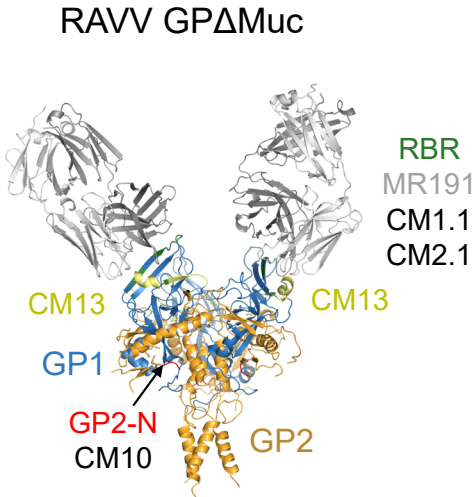

**Figure S6.** Cartoon representation of the crystal structure of RAVV GP $\Delta$ Muc in complex with RBR-directed neutralizing antibody MR191 (PDB ID 6BP2). GP1 and GP2 are colored blue and orange, respectively, and MR191 is colored gray.

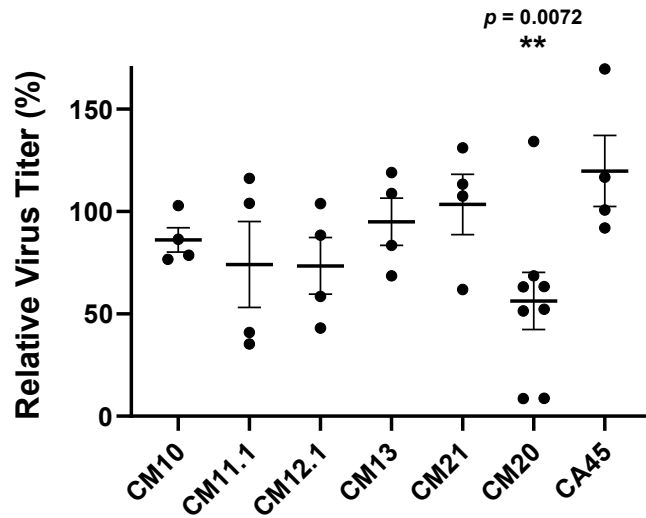

**Figure S7. MARV pseudovirus release in presence of antibodies.** MARV-VSV pseudovirus titers released into cell culture supernatants when produced in the presence of listed antibodies, shown as a percentage relative to titers released in the absence of antibodies. Values are means across two independent experiments, with 4-8 technical replicates per antibody. Error bars indicate standard error of the mean. Ebola virus specific antibody CA45 was used as a negative control.
